# Supplementary material
Source: PubMed Central journal article supplement (PMC2976459)
Supplement: supp_192_22_5934__1.pdf [file supp_192_22_5934__1.pdf]

**Sequence alignment between colicins K, 5 and 10.** These three pore-forming colicins using the Tsx protein as outer membrane receptor, their reception (central) and pore-formation (C-terminal) domains are similar whereas the translocation (N-terminal) domains are different. The sequence alignment highlights the sequence similarities and has been the base for the definition of the translocation domain. The sequence used in this study is indicated in brackets. The sequence alignment has been build by Clustal W on the pbil server (<http://npsa-pbil.ibcp.fr/>).
